# Supplementary material
Source: publisher figshare collection journal article supplement (https://acs.figshare.com/ndownloader/files/20140040)

**Supporting Information for publication:**

$\gamma$ -Radiolysis of Room Temperature Ionic Liquids.  
An EPR Spin-Trapping Study

*Peter Tarábek<sup>†</sup>, Alexandra Lisovskaya and David M. Bartels<sup>\*</sup>*

Radiation Laboratory, University of Notre Dame, Notre Dame, Indiana 46556

Corresponding Author: [David.M.Bartels.5@nd.edu](mailto:David.M.Bartels.5@nd.edu); phone (574) 631-5561; fax: (574) 631-8068.

**Contents:**

The E<sub>γ</sub>' center signal in irradiated EPR quartz cell (Figure S1). Higher resolution EPR spectra adducts derived from Et<sub>3</sub>NH<sup>+</sup> Tf<sub>2</sub>N<sup>-</sup> with 25 mM POBN diluted in CH<sub>2</sub>Cl<sub>2</sub> with 0.1G modulation amplitude (Figure S2). EPR spectra and G values of adducts observed in irradiated ILs at various POBN concentrations, diluted in CH<sub>2</sub>Cl<sub>2</sub> (Figures S3-S5) (PDF).

**Figure S1.** The  $E_y'$  center signal from the irradiated EPR quartz cell serves as an internal magnetic field reference.

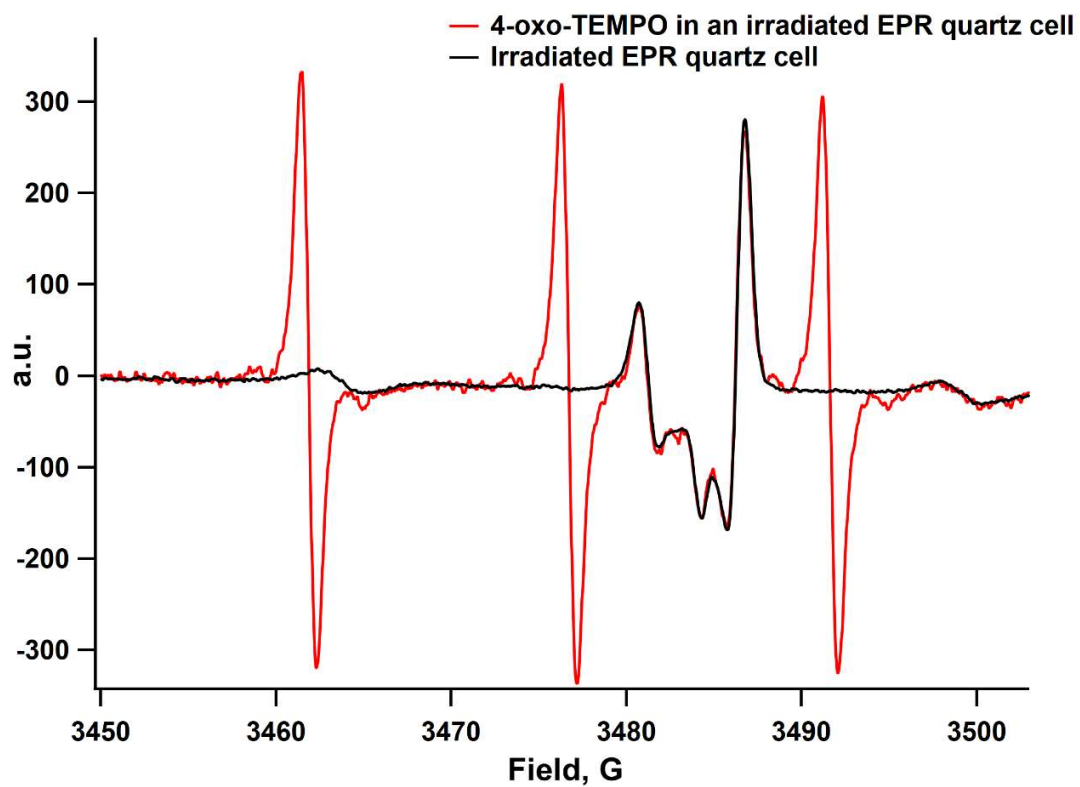

**Figure S2.** Higher resolution EPR spectra adducts derived from 6.6kGy irradiated Et<sub>3</sub>NH<sup>+</sup> Tf<sub>2</sub>N<sup>-</sup> with 25 mM POBN diluted in CH<sub>2</sub>Cl<sub>2</sub> with 0.1G modulation amplitude. Fitting parameters in Gauss: 85% •CF<sub>3</sub> adduct,  $a_{H\beta} = 1.35$ ,  $a_{F\gamma} = 1.77$ , (LW = 0.47),  $a_{H\gamma} = 0.28$ ; 15% triplet of doublets,  $a_{H\beta} = 3.7$  (LW = 1.7), Gaussian FWHM=0.08.

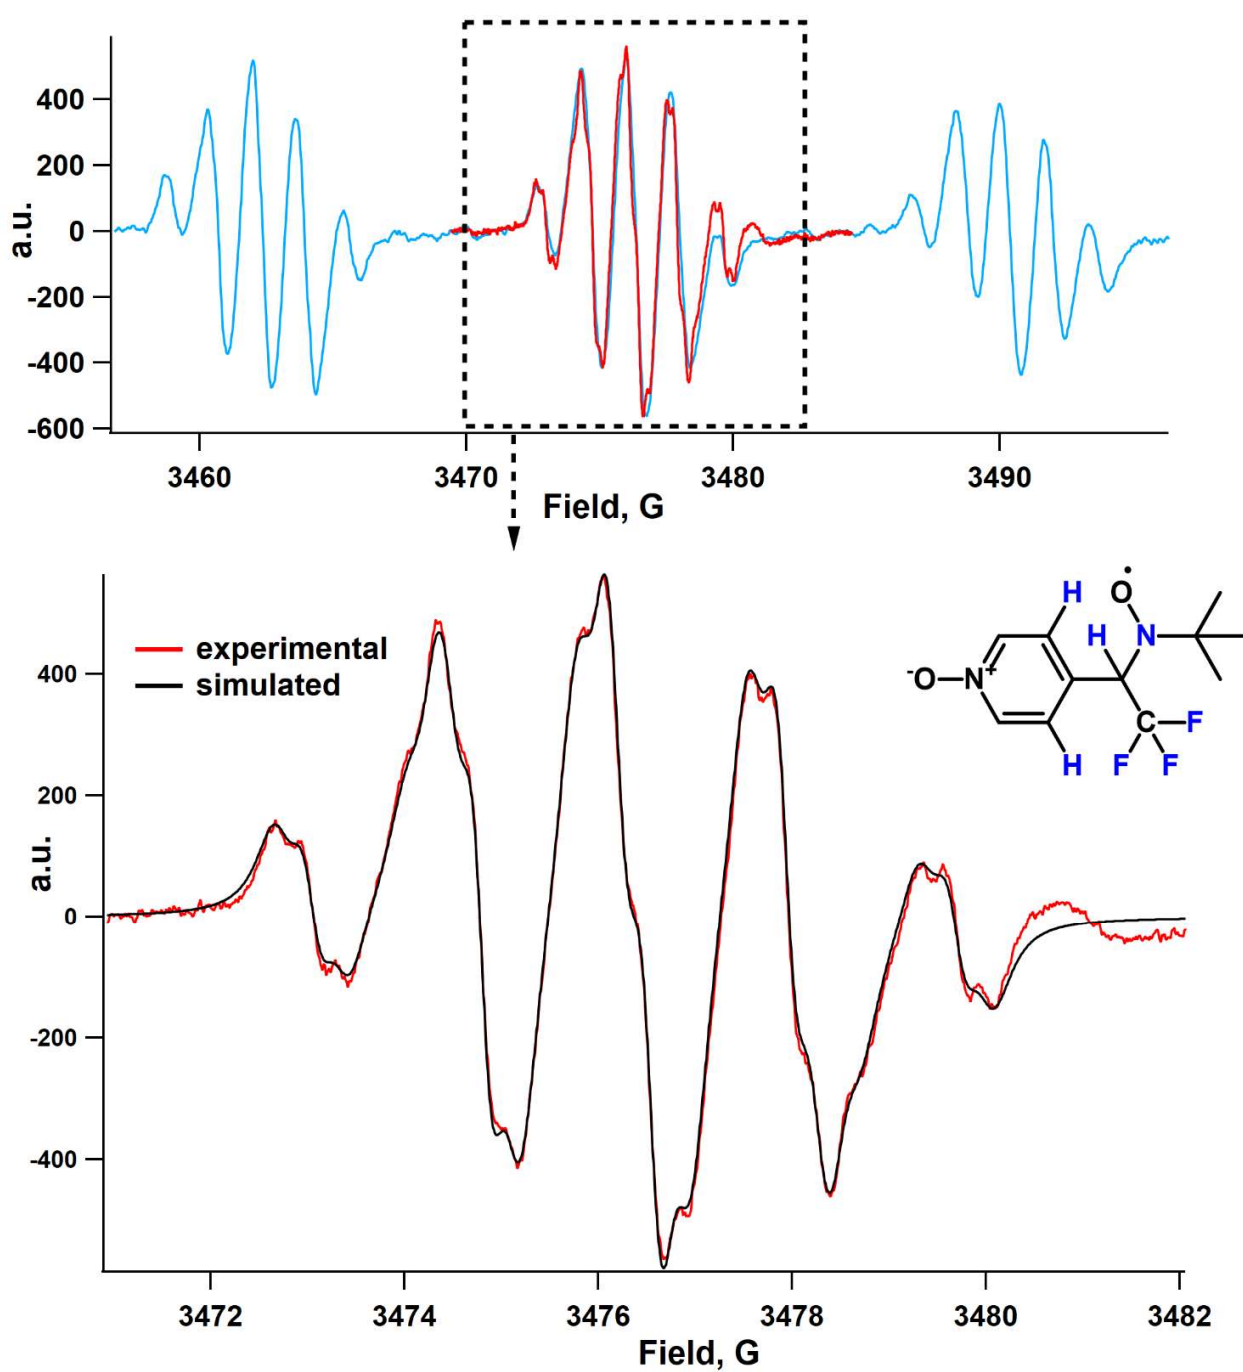

**Figure S3.** EPR spectra (A) and G values (B) of adducts observed in 1.2kGy irradiated bmpyrr<sup>+</sup> Tf<sub>2</sub>N<sup>-</sup> at various POBN concentrations, diluted in CH<sub>2</sub>Cl<sub>2</sub>.

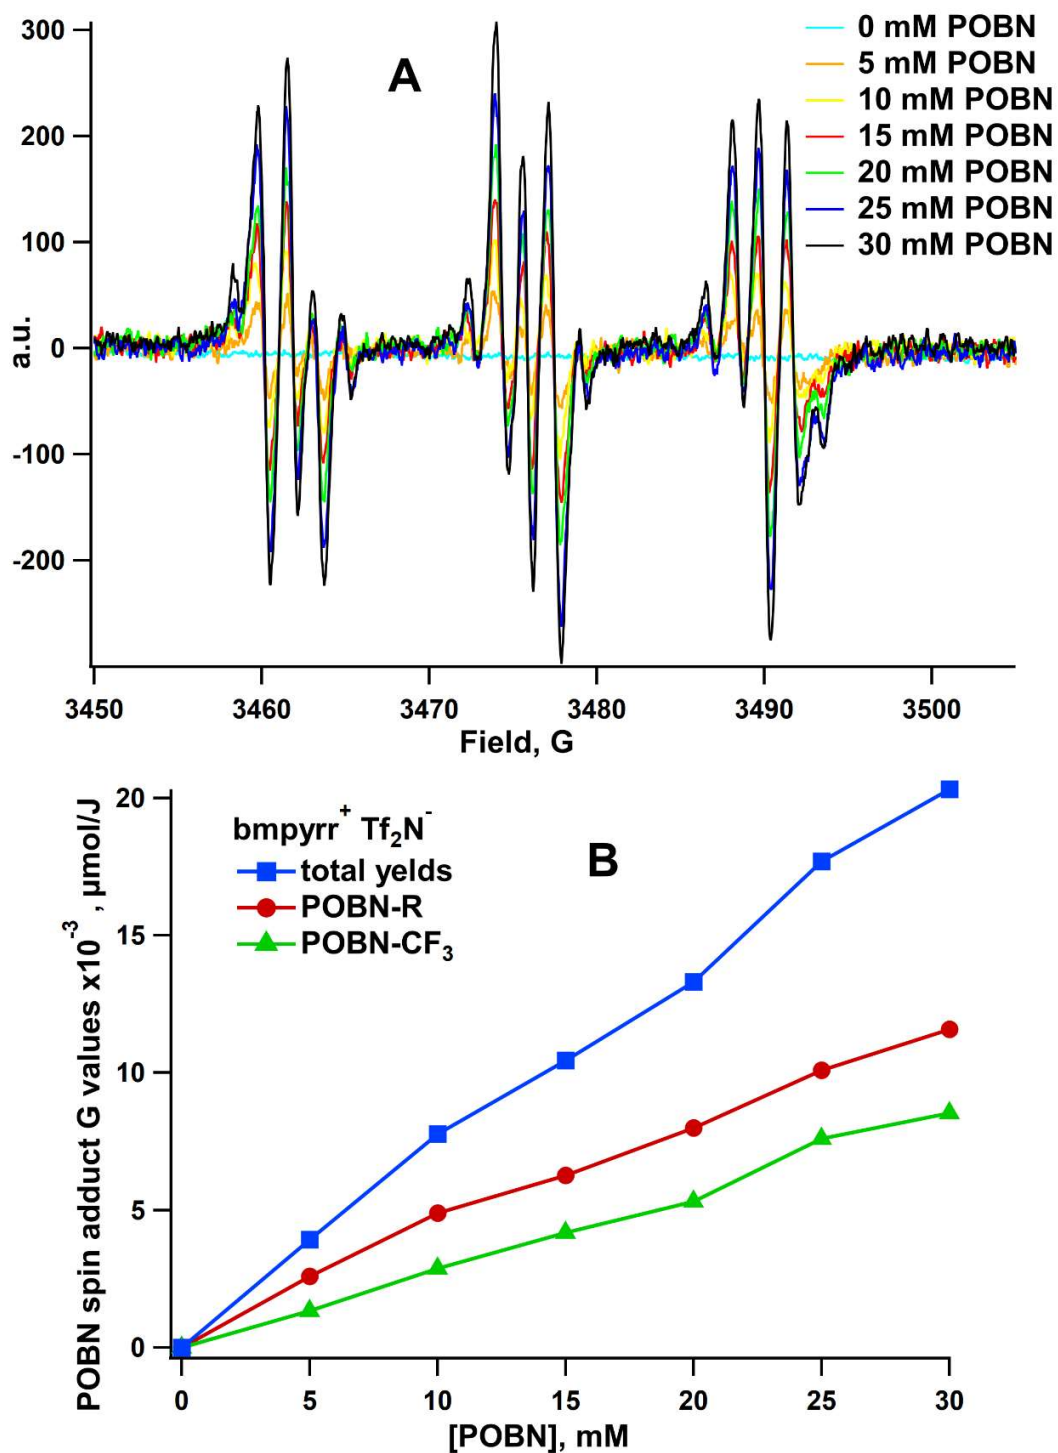

**Figure S4.** EPR spectra (A) and G values (B) of adducts observed in 1200Gy irradiated  $P_{66614}^+ Tf_2N^-$  at various POBN concentrations, diluted in  $CH_2Cl_2$ .

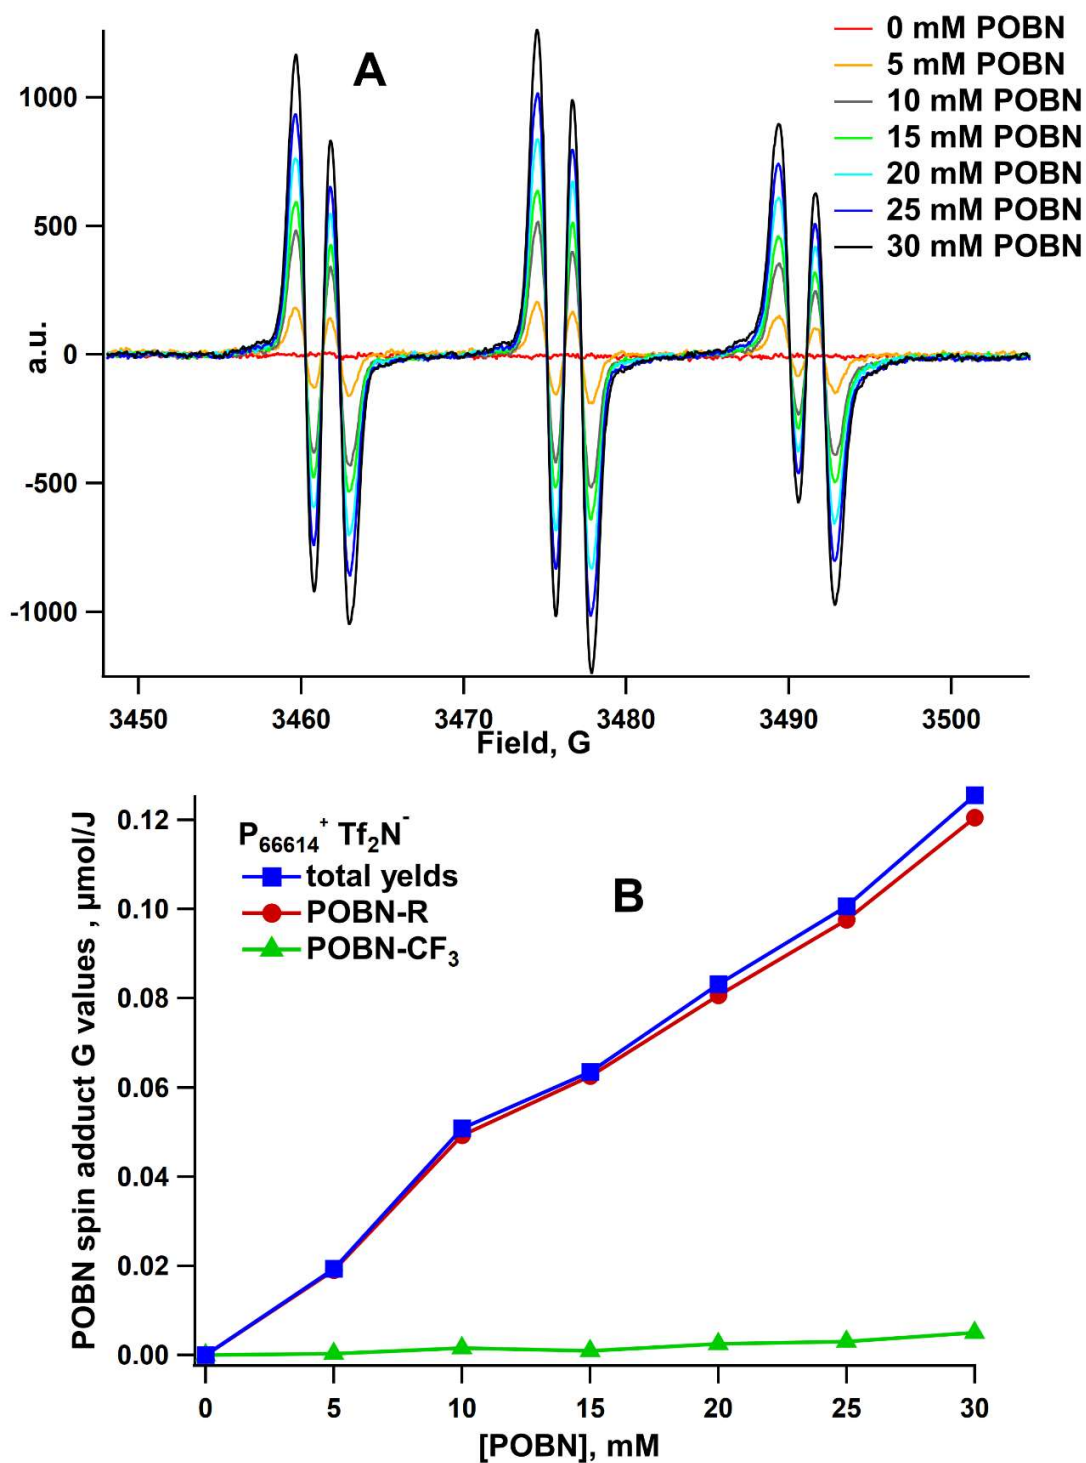

**Figure S5.** EPR spectra (A) and G values (B) of adducts observed in 1200Gy irradiated  $\text{hmpy}^+ \text{Tf}_2\text{N}^-$  at various POBN concentrations, diluted in  $\text{CH}_2\text{Cl}_2$ . The pattern changes with the POBN concentration.

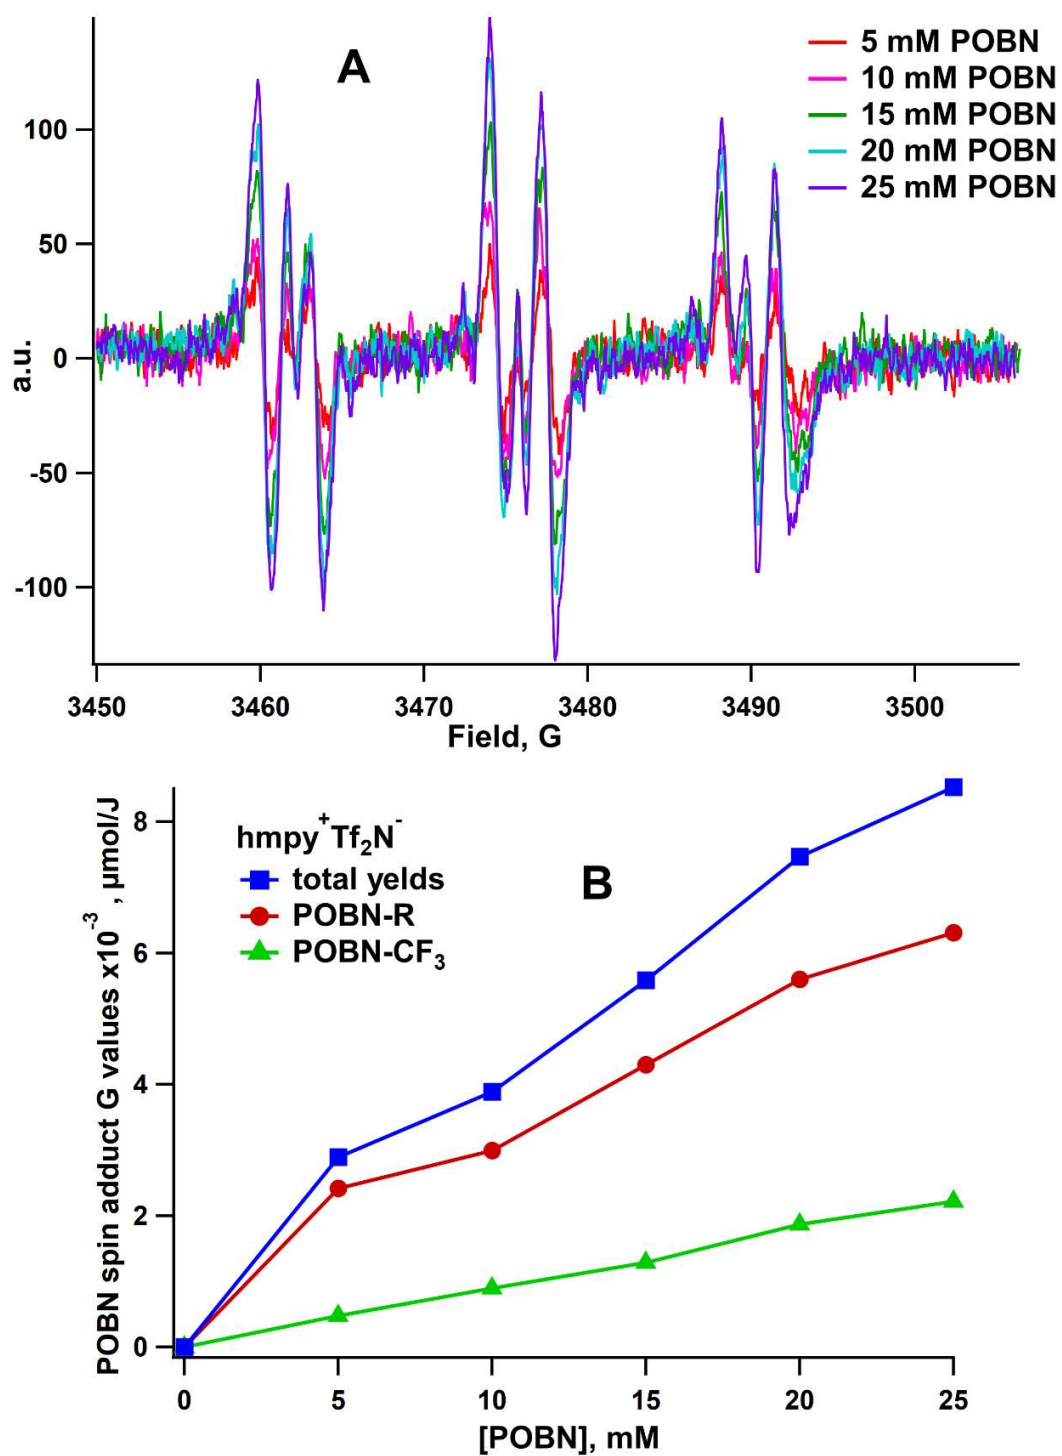

Supplement: Supplementary file 1 [file 20140040]
